# Supplementary material for: Clinical Utility of Cxbladder for the Diagnosis of Urothelial Carcinoma
Source: Springer Nature journal article supplement (doi:10.1007/s12325-017-0518-7), 2017-03-24

## Appendix 1

Table A1. Individual case dispositions. Cases in shaded row were positive for UC

| Case  |         |            |     |                | Cxbladder result            |                   |
|-------|---------|------------|-----|----------------|-----------------------------|-------------------|
| study | Smoking |            |     |                |                             |                   |
| no.   | Gender  | history    | Age | Ethnicity      | Triage setting              | Detection setting |
| 1     | F       | Smoker     | 84  | Caucasian      | PHYSICIAN-DIRECTED PROTOCOL | LOW               |
| 2     | F       | Ex-smoker  | 66  | Caucasian      | NEGATIVE                    | LOW               |
| 3     | F       | Ex-smoker  | 61  | Caucasian      | NEGATIVE                    | LOW               |
| 4     | F       | Non-smoker | 79  | Caucasian      | PHYSICIAN-DIRECTED PROTOCOL | HIGH              |
| 5     | F       | Non-smoker | 71  | Caucasian      | NEGATIVE                    | LOW               |
| 6*    | F       | Non-smoker | 91  | Asian/Indian   | PHYSICIAN-DIRECTED PROTOCOL | HIGH              |
| 7     | F       | Non-smoker | 72  | Middle Eastern | NEGATIVE                    | LOW               |
| 8     | M       | Smoker     | 64  | Caucasian      | PHYSICIAN-DIRECTED PROTOCOL | LOW               |
| 9     | M       | Smoker     | 32  | Asian/Indian   | NEGATIVE                    | LOW               |
| 10    | M       | Ex-smoker  | 82  | Caucasian      | PHYSICIAN-DIRECTED PROTOCOL | LOW               |
| 11    | M       | Ex-smoker  | 64  | Caucasian      | PHYSICIAN-DIRECTED PROTOCOL | LOW               |
| 12†   | M       | Ex-smoker  | 69  | Caucasian      | PHYSICIAN-DIRECTED PROTOCOL | MEDIUM            |
| 13    | M       | Ex-smoker  | 63  | Caucasian      | PHYSICIAN-DIRECTED PROTOCOL | LOW               |
| 14    | M       | Ex-smoker  | 35  | Middle Eastern | NEGATIVE                    | LOW               |
| 15    | M       | Ex-smoker  | 88  | Asian/Indian   | PHYSICIAN-DIRECTED PROTOCOL | LOW               |
| 16    | M       | Non-smoker | 82  | Caucasian      | NEGATIVE                    | LOW               |
| 17    | F       | Non-smoker | 54  | NA             | NEGATIVE                    | LOW               |
| 18    | F       | Non-smoker | 83  | NA             | PHYSICIAN-DIRECTED PROTOCOL | LOW               |
| 19    | F       | Non-smoker | 57  | NA             | NEGATIVE                    | LOW               |
| 20    | M       | Smoker     | 77  | NA             | NEGATIVE                    | LOW               |
| 21    | M       | Non-smoker | 33  | NA             | NEGATIVE                    | LOW               |

|    |   |            |    |           |                             |     |
|----|---|------------|----|-----------|-----------------------------|-----|
| 22 | F | Non-smoker | 75 | NA        | NEGATIVE                    | LOW |
| 23 | F | Non-smoker | 86 | NA        | NEGATIVE                    | LOW |
| 24 | M | Ex-smoker  | 68 | NA        | NEGATIVE                    | LOW |
| 25 | F | Non-smoker | 37 | NA        | NEGATIVE                    | LOW |
| 26 | F | Non-smoker | 34 | NA        | NEGATIVE                    | LOW |
| 27 | F | Non-smoker | 55 | NA        | NEGATIVE                    | LOW |
| 28 | F | Non-smoker | 33 | NA        | NEGATIVE                    | LOW |
| 29 | F | Non-smoker | 75 | Caucasian | NEGATIVE                    | LOW |
| 30 | F | Ex-smoker  | 50 | Caucasian | NEGATIVE                    | LOW |
| 31 | M | Non-smoker | 84 | NA        | NEGATIVE                    | LOW |
| 32 | F | Non-smoker | 81 | NA        | PHYSICIAN-DIRECTED PROTOCOL | LOW |
| 33 | M | Non-smoker | 68 | NA        | NEGATIVE                    | LOW |

\*High-grade Ta; †Low grade Ta

F, female; M, Male; NA, not available

## **Appendix 2**

Below is a list of the urologists who acted as participating physicians during this study (in alphabetical order):

Lewis Chan (Concord Hospital, Sydney, NSW, AUSTRALIA)

Christopher Chemasle (Palmerston North Urology, Palmerston North, NEW ZEALAND)

Joe DiTrollo (Roseland, NJ, USA)

Sia Daneshmand (University of Southern California, Los Angeles, CA, USA)

Peter Gilling (Urology BOP, Tauranga, NEW ZEALAND)

Dennis Gyomber (John Fawcner Hospital Consulting Suites, Melbourne, VIC, AUSTRALIA)

Jonathan Masters (Auckland City Hospital, Auckland, NEW ZEALAND)

Scott Owens (Urology of Central Pennsylvania, Camp Hill, PA, USA)

Jay Raman (Penn State Milton S. Hershey Medical Center, Hershey, PA, USA)

Rod Studd (Southern Cross Hospital, Wellington, NEW ZEALAND)

James Sylora (Mid West Urologist, Evergreen Park, IL, USA)

Kian Tai (Tan Tock Seng Hospital Medical Centre, SINGAPORE)

### Appendix 3

**Figure A3.** Number of patients with at least one invasive diagnostic test requested following primary evaluation. Dashed line represents the number of patients for whom at least one invasive diagnostic procedure was expected to have been requested (A); Change in the number of patients referred for invasive diagnostic procedures by individual participants after disclosure of Cxbladder results in both the Triage and Detect modalities (B). ○ and ○○ indicate where one or two cases of UC, respectively, would not have been referred for invasive diagnostics following primary evaluation. Note: all patients with UC would have been referred for an invasive test following disclosure of Cxbladder results.

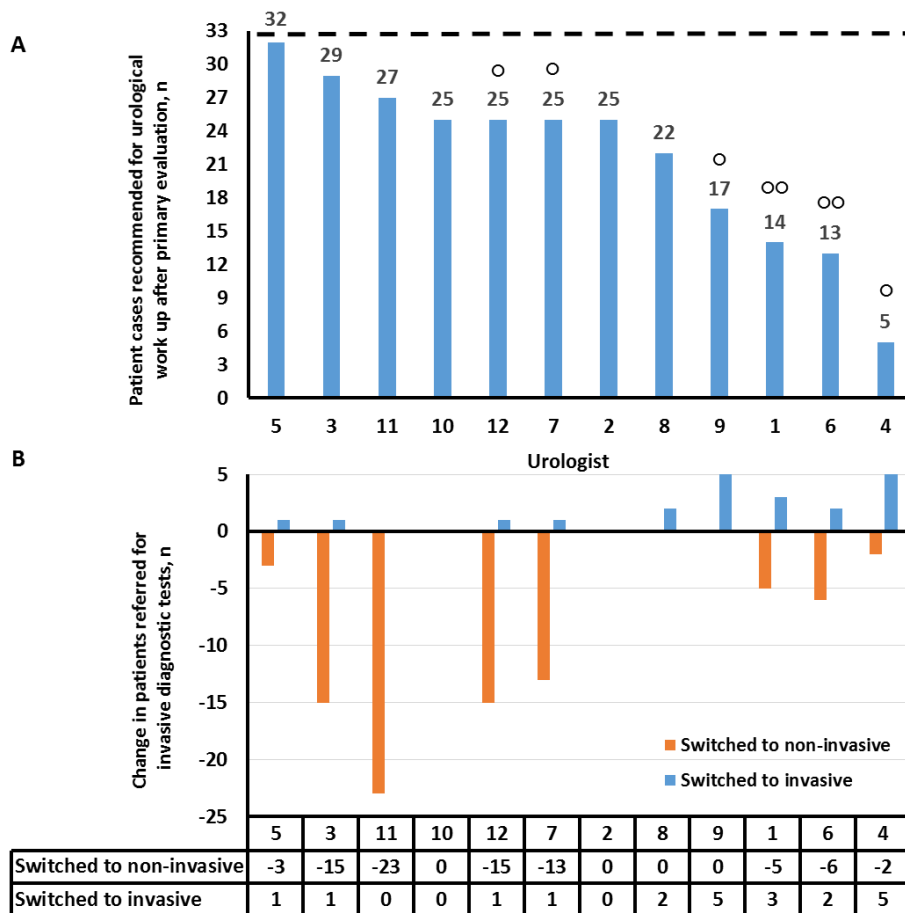

Supplement: MOESM1 [file 12174844]
